# Supplementary material for: Vertebroplasty versus sham procedure for painful acute osteoporotic vertebral compression fractures (VERTOS IV): randomised sham controlled clinical trial
Source: PubMed Central journal article supplement — BMJ. 2018 May 9;361:k1551. doi: 10.1136/bmj.k1551 (PMC5941218; doi:10.1136/bmj.k1551), 2018-05-09

# SUPPLEMENT

## Table of Contents

|                | Page |
|----------------|------|
| Table A1.....  | 2    |
| Table A2.....  | 4    |
| Table A3.....  | 5    |
| Table A4.....  | 6    |
| Figure A1..... | 7    |

| <b>Table A1. For each group and each time point the mean Qualeffo score (including 95% CI).</b> |                        |                          |                         |
|-------------------------------------------------------------------------------------------------|------------------------|--------------------------|-------------------------|
| <b>Measure</b>                                                                                  | <b>PV group (N=90)</b> | <b>Sham group (N=86)</b> | <b>Group difference</b> |
| <b>QUALEFFO★</b>                                                                                | <b>Mean (95% CI) †</b> | <b>Mean (95% CI) †</b>   | <b>Mean (95% CI)§</b>   |
| At baseline                                                                                     | 59.73 (55.96 to 63.51) | 60.70 (56.84 to 64.56)   | 0.96 (−4.43 to 6.36)    |
| At week 1                                                                                       | 53.07 (49.29 to 56.85) | 51.84 (47.97 to 55.70)   | −1.23 (−6.64 to 4.17)   |
| At 1 month                                                                                      | 47.77 (43.99 to 51.56) | 49.32 (45.45 to 53.19)   | 1.55 (−3.87 to 6.96)    |
| At 3 months                                                                                     | 44.24 (40.44 to 48.04) | 44.97 (41.07 to 48.87)   | 0.73 (−4.72 to 6.17)    |
| At 6 months                                                                                     | 43.56 (39.73 to 47.38) | 42.90 (38.95 to 46.84)   | −0.66 (−6.16 to 4.83)   |
| At 12 months                                                                                    | 41.41 (37.54 to 45.28) | 42.09 (38.05 to 46.13)   | 0.68 (−4.91 to 6.27)    |
| Difference between<br>Baseline & 12 months                                                      | 18.32 (13.03 to 23.61) | 18.61 (13.02 to 24.20)   | −0.14 (−3.04 to 2.76)   |

**Legends**

† **Statistically significant difference between Qualeffo at baseline and at each follow-up.**

\* **Model estimates were adjusted based on the covariates age, gender, vertebral level, pain treatment, osteonecrosis, new fractures after baseline and further vertebral height loss.**

**PV Percutaneous Vertebroplasty**

★ **QUALEFFO= Scores on the Quality of Life Questionnaire of the European Foundation of Osteoporosis range from 0 to 100, higher scores are indicating worse quality of life**

§ The between group differences are contrast estimates at each time point based on the custom hypothesis test function in the SPSS Mixed analysis. Positive estimates favor the sham procedure, negative favor the PV procedure.

| <b>Table A2. For each group and each time point the mean RMDQ score (including 95% CI)*.</b> |                        |                          |                         |
|----------------------------------------------------------------------------------------------|------------------------|--------------------------|-------------------------|
| <b>Measure</b>                                                                               | <b>PV group (N=90)</b> | <b>Sham group (N=86)</b> | <b>Group difference</b> |
| <b>RMDQ★</b>                                                                                 | <b>Mean (95% CI) †</b> | <b>Mean (95% CI) †</b>   | <b>Mean (95% CI)§</b>   |
| At baseline                                                                                  | 18.02 (16.75 to 19.29) | 17.79 (16.49 to 19.09)   | -0.23 (-2.05 to 1.58)   |
| At week 1                                                                                    | 14.83 (13.55 to 16.10) | 14.01 (12.71 to 15.31)   | -0.81 (-2.63 to 1.01)   |
| At 1 month                                                                                   | 11.86 (10.56 to 13.14) | 12.98 (11.67 to 14.29)   | 1.12 (-0.71 to 2.95)    |
| At 3 months                                                                                  | 10.90 (9.62 to 12.20)  | 11.51 (10.18 to 12.84)   | 0.60 (-1.25 to 2.46)    |
| At 6 months                                                                                  | 10.09 (8.79 to 11.39)  | 10.97 (9.62 to 12.33)    | 0.88 (-1.00 to 2.76)    |
| At 12 months                                                                                 | 10.31 (8.98 to 11.63)  | 10.32 (8.92 to 11.72)    | 0.01 (-1.92 to 1.94)    |
| Difference between<br>Baseline & 12 months                                                   | 7.71 (5.87 to 9.55)    | 7.47 (5.56 to 9.38)      | 0.12 (-1.11 to 1.35)    |

**Legends**

† **Statistically significant difference between RMDQ at baseline and at each follow-up.**

\* **Model estimates were adjusted based on the covariates age, gender, vertebral level, pain treatment, osteonecrosis, new fractures after baseline and further vertebral height loss.**

**PV Percutaneous Vertebroplasty**

★ **RMDQ= Scores on the Roland – Morris Disability Questionnaire range from 0 to 24, higher scores indicating worse physical functioning.**

§ **Contrast estimates represent differences between groups at each time point and are estimated based on the custom hypothesis test function in the SPSS Mixed analysis. Positive estimates favor the sham procedure, negative favor the PV procedure.**

**Table A3. For both the vertebroplasty and sham groups the number of patients over a one-year time course (x-axis) using no medication, non-opiate medication (aspirin, paracetamol, non-steroidal anti-inflammatory drugs (NSAIDs)), weak opiates (codeine, tramadol), and strong opiates (morphine, fentanyl).**

| Medication            | Group | Baseline           | 1 day              | 1 week             | 1 month            | 3 months           | 6 months           | 12 months          |
|-----------------------|-------|--------------------|--------------------|--------------------|--------------------|--------------------|--------------------|--------------------|
| No medication         | PV    | 4 (4%)<br>N = 90   | 19 (21%)<br>N = 89 | 14 (16%)<br>N = 88 | 34 (40%)<br>N = 86 | 34 (40%)<br>N = 85 | 40 (48%)<br>N = 83 | 35 (44%)<br>N = 79 |
|                       | Sham  | 8 (9%)<br>N = 86   | 29 (34%)<br>N = 86 | 21 (25%)<br>N = 85 | 34 (40%)<br>N = 85 | 33 (41%)<br>N = 80 | 33 (42%)<br>N = 78 | 33 (47%)<br>N = 70 |
| Non-opiate medication | PV    | 78 (87%)<br>N = 90 | 60 (67%)<br>N = 89 | 67 (76%)<br>N = 88 | 43 (50%)<br>N = 86 | 45 (53%)<br>N = 85 | 37 (45%)<br>N = 83 | 35 (44%)<br>N = 79 |
|                       | Sham  | 65 (76%)<br>N = 86 | 46 (54%)<br>N = 86 | 60 (71%)<br>N = 85 | 48 (56%)<br>N = 85 | 42 (52%)<br>N = 80 | 40 (51%)<br>N = 78 | 32 (46%)<br>N = 70 |
| Weak opiates          | PV    | 13 (14%)<br>N = 90 | 7 (8%)<br>N = 89   | 6 (7%)<br>N = 88   | 6 (7%)<br>N = 86   | 5 (6%)<br>N = 85   | 4 (5%)<br>N = 83   | 2 (2%)<br>N = 79   |
|                       | Sham  | 17 (20%)<br>N = 86 | 10 (12%)<br>N = 86 | 7 (8%)<br>N = 85   | 4 (5%)<br>N = 85   | 3 (4%)<br>N = 80   | 4 (5%)<br>N = 78   | 0 (0%)<br>N = 70   |
| Strong opiates        | PV    | 42 (47%)<br>N = 90 | 30 (34%)<br>N = 89 | 31 (35%)<br>N = 88 | 18 (21%)<br>N = 86 | 17 (20%)<br>N = 85 | 12 (14%)<br>N = 83 | 13 (16%)<br>N = 79 |
|                       | Sham  | 25 (29%)<br>N = 86 | 24 (28%)<br>N = 86 | 16 (19%)<br>N = 85 | 19 (22%)<br>N = 85 | 13 (16%)<br>N = 80 | 13 (17%)<br>N = 78 | 11 (16%)<br>N = 70 |

| <b>Table A4. Computer Tomography (CT) measured cement leakage.</b> |                                  |          |
|--------------------------------------------------------------------|----------------------------------|----------|
| <b>Measure</b>                                                     | <b>PV group (N-115) §</b>        | <b>%</b> |
| <b>CT leakage★</b>                                                 | <b>No. Vertebra with leakage</b> |          |
| Type ¶ 1                                                           | 23                               | 20%      |
| Type 2                                                             | 17                               | 15%      |
| Type 3                                                             | 12                               | 10%      |
| Type 4                                                             | 45                               | 39%      |
| Type 5                                                             | 8                                | 7%       |
| Type 6                                                             | 9                                | 8%       |

**Legends**

**PV** Percutaneous Vertebroplasty

★ The threshold for describing leakage was anything perceptible.

§ Number of vertebral fractures treated in the PV group. The same vertebra could show one or more types of leakage

¶ Type 1 leakage: intervertebral discus above the treated level; Type 2 leakage: intervertebral discus under the treated level; Type 3: perivertebral soft tissue; Type 4: perivertebral veins; Type 5: pulmonary; Type 6: spinal canal.

**Figure A1** For both the vertebroplasty and sham groups the number of patients (y-axis) over a one-year time course (x-axis) using no medication, non-opiate medication (aspirin, paracetamol, non-steroidal anti-inflammatory drugs (NSAIDs)), weak opiates (codeine, tramadol), and strong opiates (morphine, fentanyl).

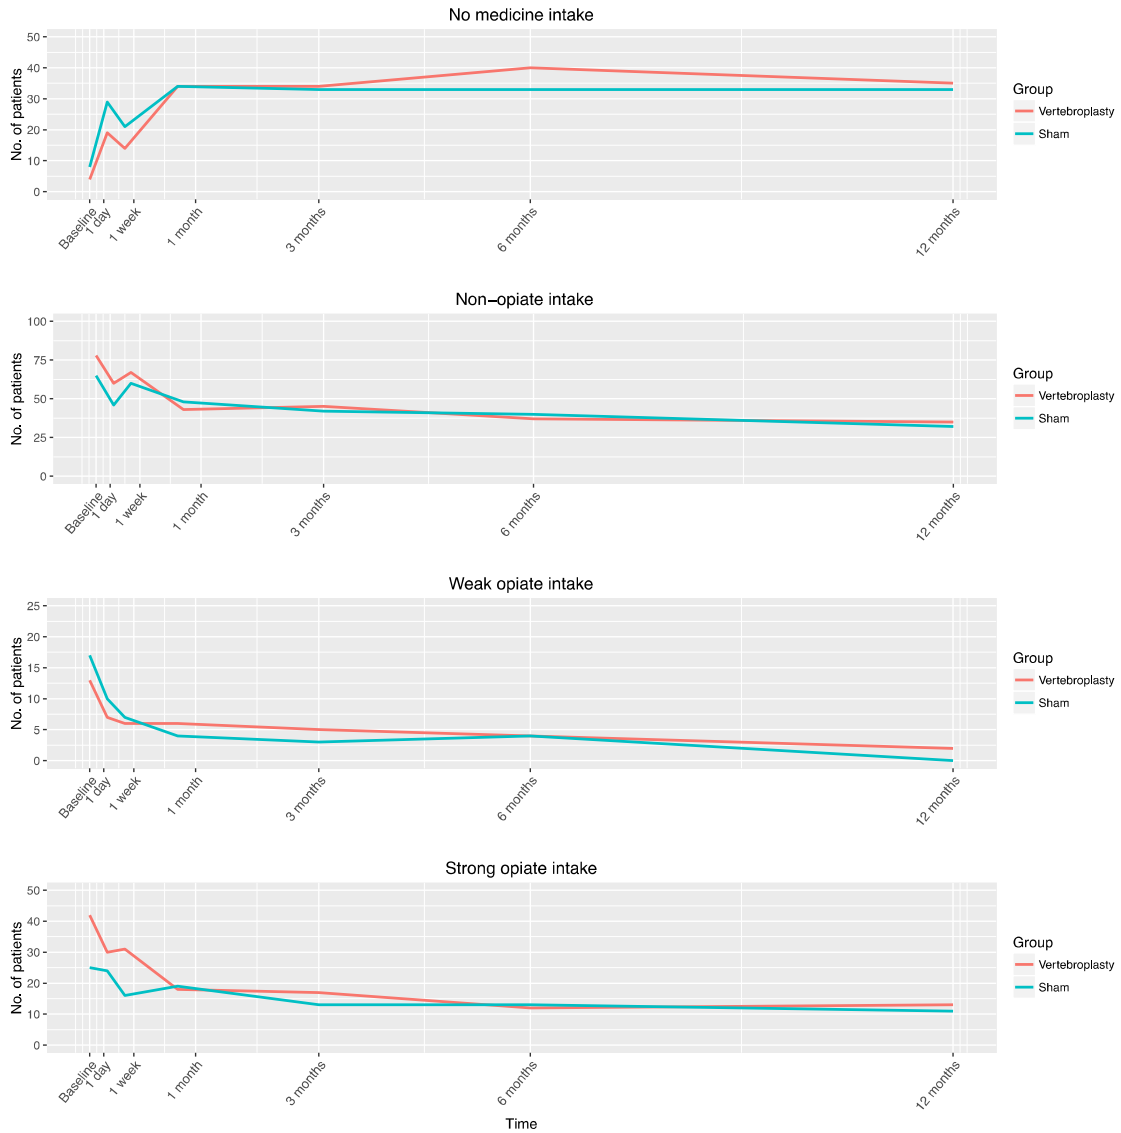

Supplement: firc042734.ww1.pdf [file firc042734.ww1.pdf]
